# Supplementary material for: AGO2 localizes to cytokinetic protrusions in a p38-dependent manner and is needed for accurate cell division
Source: PubMed Central journal article supplement (PMC8196063; doi:10.1038/s42003-021-02130-0), 2021-06-11
Supplement: 42003_2021_2130_MOESM2_ESM.pdf [file 42003_2021_2130_MOESM2_ESM.pdf]

## Description of Additional Supplementary Files

**File name:** Supplementary movie 1

**Description:** AGO2-GFP distribution in open-ended tubes. Time-lapse video depicting the motion of AGO2-GFP in open-ended tubes. The time-lapse video was started 18 hours post- AGO2-GFP-transfection and were captured at 30 seconds time-lapse intervals for 45 minutes.

**File name:** Supplementary movie 2

**Description:** AGO2-GFP distribution in open-ended tubes. Time-lapse video depicting the motion of AGO2-GFP in open-ended tubes. The time-lapse video was started 18 hours post- AGO2-GFP-transfection and were captured at 20 seconds time-lapse intervals for 45 minutes.

**File name:** Supplementary movie 3

**Description:** AGO2-GFP distribution in cytokinetic structure of close-ended tubes. Time-lapse video monitoring AGO2-GFP motion throughout the cytokinetic intercellular bridge. The time-lapse video was started 18 hours post- AGO2-GFP-transfection and were captured at 30 seconds time-lapse intervals for 45 minutes.

**File name:** Supplementary movie 4

**Description:** AGO2-GFP distribution in cytokinetic structure of close-ended tubes. Time-lapse video monitoring AGO2-GFP motion throughout the cytokinetic intercellular bridge. The time-lapse video was started 18 hours post- AGO2-GFP-transfection and were captured at 30 seconds time-lapse intervals for 45 minutes. The video is processed using the “Find Edges” algorithm of Image J processing tool box
